# Supplementary material for: Isoform specific anti-TGFβ therapy enhances antitumor efficacy in mouse models of cancer
Source: PubMed Central journal article supplement (PMC8599839; doi:10.1038/s42003-021-02773-z), 2021-11-17
Supplement: 42003_2021_2773_MOESM3_ESM.pdf [file 42003_2021_2773_MOESM3_ESM.pdf]

## Description of Additional Supplementary Files

**File name:** Supplementary Data 1

**Description:** Source data for main Figure files.
